# Supplementary material
Source: publisher figshare collection journal article supplement (https://gsajournals.figshare.com/ndownloader/files/13477055)
Supplement: Supplementary file 1 [file 13477055]

**Table S2**. Phenotypes collected for stripe rust resistance.

| **Phenotyping datasets** | **Location** | **Year** | **Scale** | **Description** |
| --- | --- | --- | --- | --- |
| ROS10_YR_SV1 | Rossville, KS | 2010 | 0-100% | Severity |
| ROS10_YR_IT2 | Rossville, KS | 2010 | 1-9 | Infection type |
| GH11_YR_SV1 | Greenhouse | 2011 | 0-100% | Severity |
| GH11_YR_IT2 | Greenhouse | 2011 | 1-9 | Infection type |
| ROS11_YR_IT2 | Rossville, KS | 2011 | 1-9 | Infection type |
| ROS11_YR_SV3 | Rossville, KS | 2011 | 0-100% | Severity |
| TEX_2012_IT | Castroville, Texas | 2012 | 1-9 | Infection type |
| GH10_YR_SD | Greenhouse | 2010 | 1-9 | Seedling resistance |
